# Supplementary material for: Sulforhodamine B-LDH composite as a rare-earth-free red-emitting phosphor for LED lighting
Source: Royal Society of Chemistry journal article supplement (doi:10.1039/d0tc02802a), 2020-01-01
Supplement: d0tc02802a1.pdf [file d0tc02802a1.pdf]

## ELECTRONIC SUPPLEMENTARY INFORMATION

### **Sulforhodamine B-LDH composite as a rare-earth-free red-emitting phosphor for LED lighting.**

**Paul Legentil<sup>a</sup>, Fabrice Leroux<sup>a\*</sup>, Sandrine Therias<sup>a</sup>, Damien Boyer<sup>a</sup> and Geneviève Chadeyron<sup>a\*</sup>**

---

<sup>a</sup> *Université Clermont Auvergne, CNRS, SIGMA Clermont, ICCF, F-63000 Clermont–Ferrand, France.*

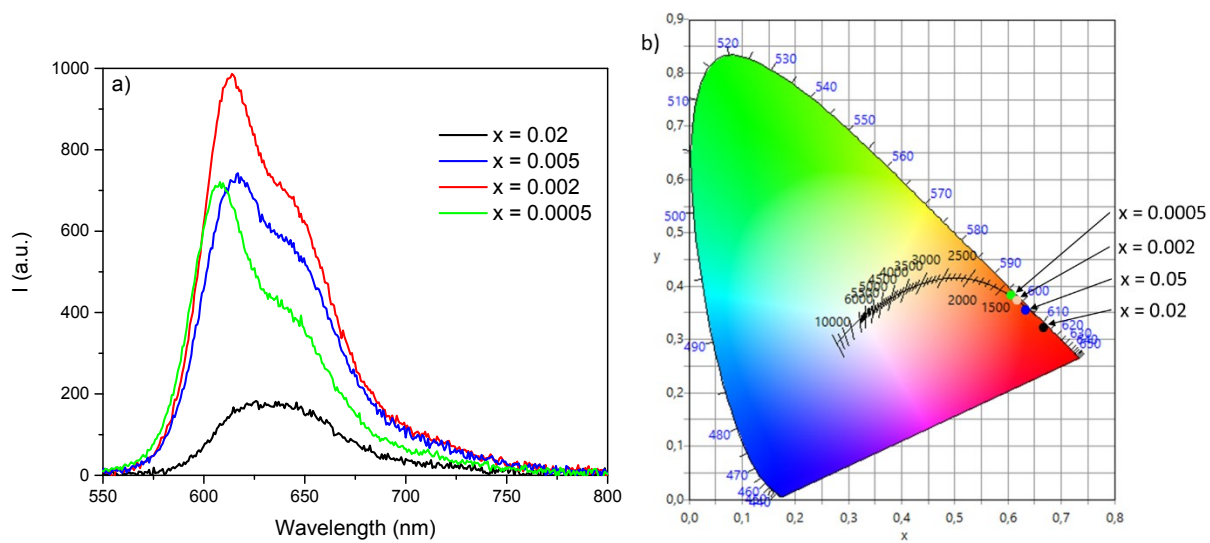

**Figure S1.** a) Evolution of the emission spectra and b) CIE chromaticity coordinates of LDH-DS-SRB ( $x = 0.0005$ , 0.005, 0.002, 0.02) powders.

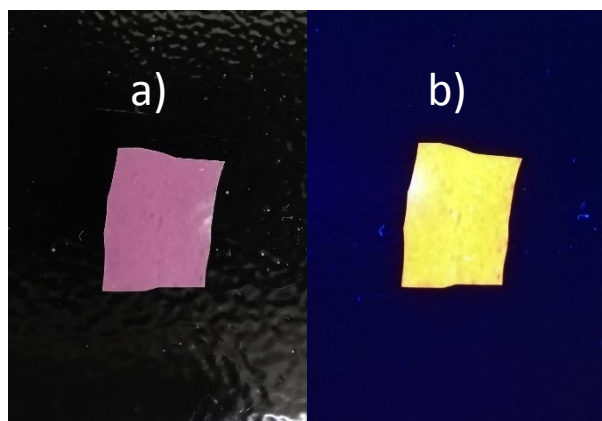

**Figure S2.** Photograph of the Si-LDS composite film a) under daylight and b) under UV radiation (365 nm).

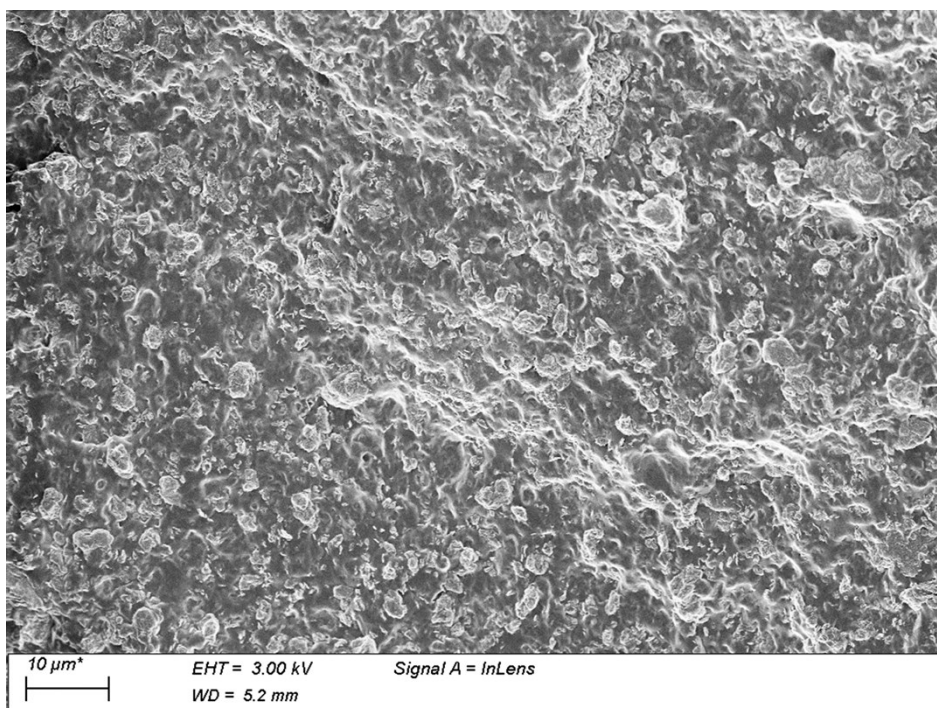

**Figure S3.** SEM image of Si-LDS composite film.

### Scanning electron microscopy (SEM)

Scanning electron microscopy was performed with a ZEISS Supra 55 VP scanning electron microscope in high vacuum at 20 kV using a back-scatter electron detector (QBSD).

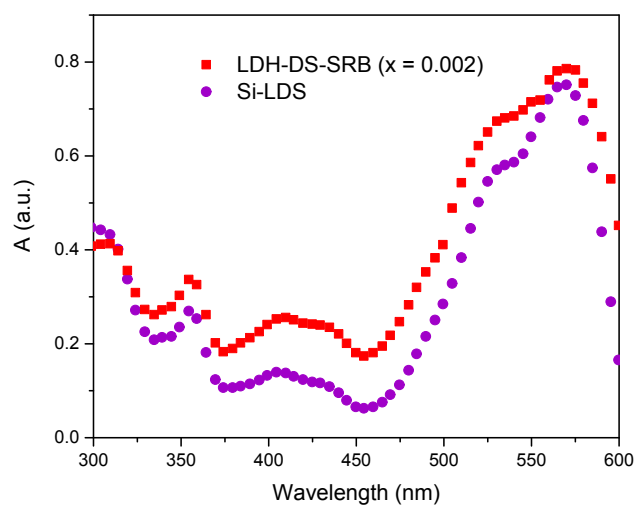

**Figure S4.** Evolution of the absorbance with the excitation wavelength for the composite film Si-LDS and the LDH-DS-SRB ( $x = 0.002$ ) powder.

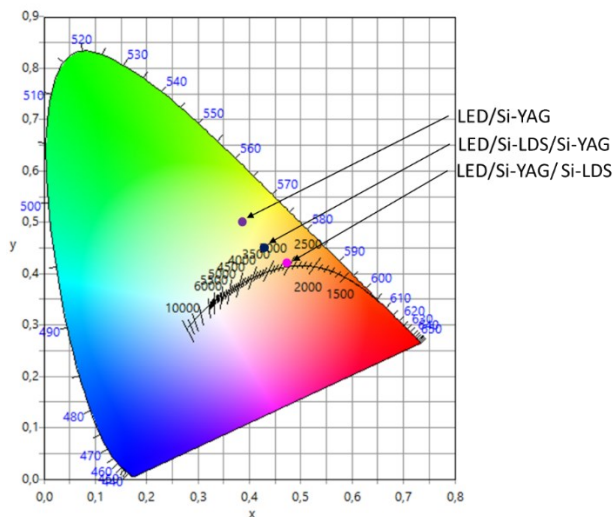

**Figure S5.** CIE chromaticity coordinates given by the configuration b, c and d on Fig. 9.

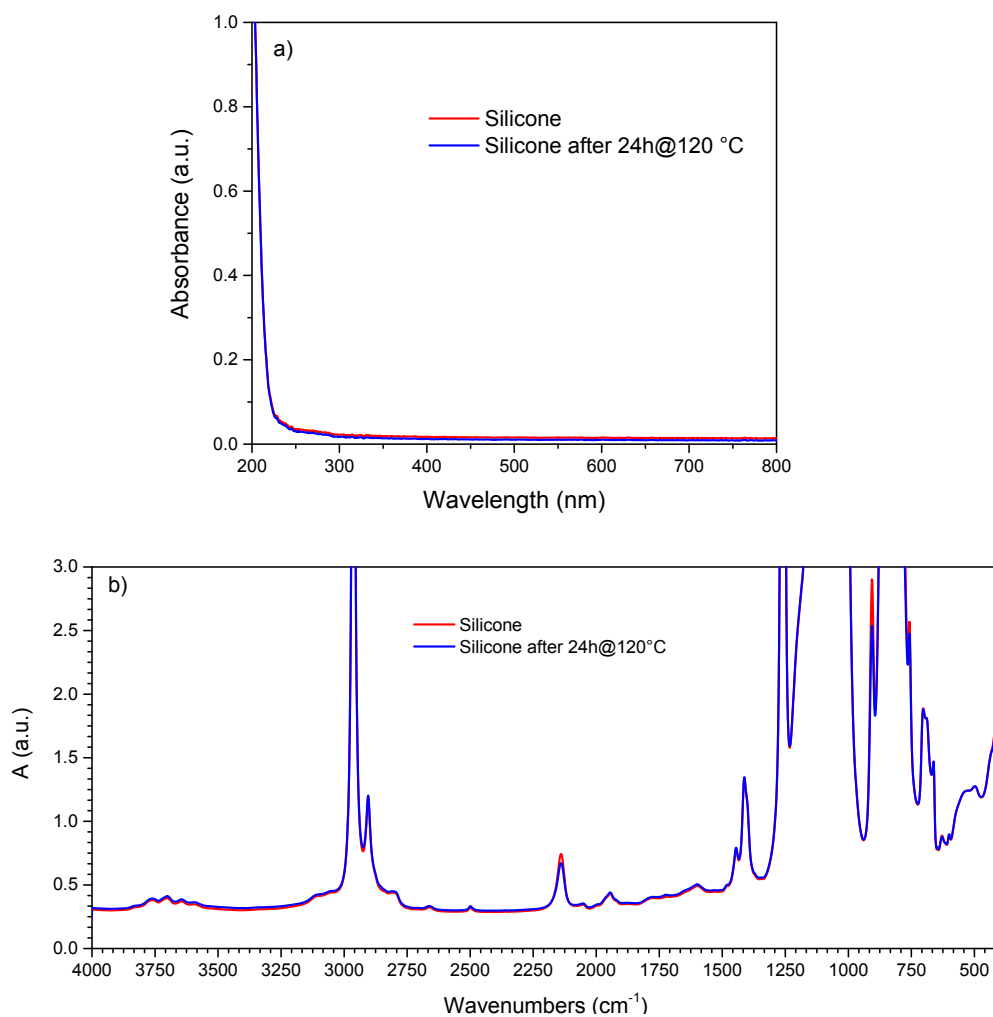

**Figure S6.** a) UV-vis spectra and b) IR spectra of a silicone film before and after a 24h thermal treatment at 120°C.
